1 **Resting EEG spectral slopes are associated with age-related differences in information processing**

2 **speed**

3

4 Pathania, A.<sup>1</sup>, Euler, M.J.<sup>2</sup>, Clark, M.<sup>1</sup>, Cowan, R.<sup>1</sup>, Duff, K.<sup>3</sup>, & Lohse, K.R.<sup>1,4</sup>

5

6 <sup>1</sup>Department of Health and Kinesiology, University of Utah

7 <sup>2</sup>Department of Psychology, University of Utah

8 <sup>3</sup>Department of Neurology, University of Utah

9 <sup>4</sup>Program in Physical Therapy and Department of Neurology, Washington University School of Medicine

10 in Saint Louis

11

12 **Abstract**

13 **Background:** Previous research has shown the slope of the EEG power spectrum differentiates between  
14 older and younger adults in various experimental cognitive tasks. Here, we extend that work, assessing  
15 the relation between the EEG power spectrum and performance on the Repeatable Battery for the  
16 Assessment of Neuropsychological Status (RBANS), a widely-used neuropsychological instrument that  
17 assesses a broad range of cognitive domains.

18 **Methods:** Forty-four participants (21 younger adults, 23 older adults) completed the RBANS with EEG  
19 data collected at-rest. Using spectral parameterization, we tested the mediating effect of the spectral  
20 slope on age-related differences in subsequent cognitive task performance.

21 **Results:** Older adults performed reliably worse on the RBANS overall, and on the Attention and Delayed  
22 Memory domains. However, evidence of mediation was only found for the Coding subtest, a measure of  
23 information processing speed.

24 **Conclusions:** We found some evidence that the slope of the resting EEG power spectrum mediated age-  
25 related differences in cognition. These effects were evident only in tasks requiring speeded processing,  
26 whereas this effect was not statistically significant for delayed memory, even though age-related  
27 differences were present.

28

29 **Resting EEG spectral slopes are associated with age-related differences in information processing**  
30 **speed**

31 Aging is broadly associated with declines in cognitive and motor abilities. Although the average  
32 pattern is for a decline in cognitive function with age, these changes are heterogeneous, such that  
33 within “normal” aging, there are substantial individual differences in both average performance and  
34 changes in performance over time (Habib et al., 2007). Some individuals experience declines so severe  
35 that they exceed the range of healthy aging, leading to mild cognitive impairment (MCI) or even  
36 dementia (Tucker-Drob, 2019). These declines can be attributed to numerous neurophysiological  
37 changes over the lifespan (Bäckman et al., 2006; Cabeza et al., 2016; Hedden & Gabrieli, 2004).  
38 Furthermore, these physical changes are broad and influence many different psychological processes,  
39 such as executive functions (Buckner, 2004), affective regulation (Fiske et al., 2009), and memory  
40 formation (Nyberg et al., 2012).

41 Although numerous studies have documented the wide range of individual differences in older  
42 adults' cognitive function (Andrews et al., 2002; Dekhtyar et al., 2017; Lindenberger, 2014), the causes  
43 of these declines are unclear. Indeed, it is likely that age-related declines are multi-causal (Harada et al.,  
44 2013), further complicating the issue. Across different domains of cognition and changes in anatomical  
45 structures, one unifying way of understanding this problem from a functional perspective is the *neural*  
46 *noise hypothesis*. The neural noise hypothesis suggests that many (not all) age-related changes in  
47 cognition might be explained by a reduction in the signal-to-noise ratio of neural circuits with increased  
48 chronological age (Cremer & Zeef, 1987; Voytek & Knight, 2015; Waschke et al., 2017). Recently,  
49 researchers have proposed that the slope of the EEG power spectrum may be a viable correlate of  
50 neural noise.

51 **Characterizing the EEG Power Spectrum**

52           The slope of EEG power spectrum exhibits a pattern of  $1/f$  noise, which is a common finding in  
53 many biological, physical, and even social systems (He, 2014; Ward & Greenwood, 2007). We can think  
54 of  $1/f$  noise as a particular kind of pattern where low frequencies have the most power in the signal, and  
55 power decreases at higher frequencies; that is, there is a negative relationship between power and  
56 frequency, as is common in human EEG (Cohen, 2014), which follows the form:

57           (Eq. 1.)  $P \sim \frac{k}{f^x}$ ,

58           where the power in a signal ( $P$ ) is inversely proportional to the frequency ( $1/f$ ), with this  
59 proportionality determined by a decay parameter ( $x$ ), hereafter referred to as the exponent, and a  
60 constant ( $k$ ), hereafter referred to as the offset. When transformed into log-log space, this relationship  
61 becomes a linear function:

62           (Eq. 2.)  $\ln(P) = \ln(k) - x * \ln(f)$ ,

63           such that power in the signal monotonically decreases as the frequency increases, as shown in  
64 Figure 1. That is, in the resulting linear function, the exponent is now the slope of the line relating power  
65 to frequency. Many systems show this proportionality (with some relabeling of terms) from geology  
66 (Holliger, 1996), to music (Voss & Clarke, 1975), to human cognition (Gilden et al., 1995; Wagenmakers  
67 et al., 2004).

68           In the human EEG, a large proportion of the signal follows a broad-band  $1/f$  pattern, with  
69 deviations away from this pattern reflecting periodic activity in the canonical frequency bands (e.g.,  
70 alpha, beta, delta). Whereas decades of research has demonstrated relations between various  
71 oscillatory processes and specific psychological states or correlates, the psychological significance of the  
72 aperiodic ( $1/f$ ) component of the power spectrum has only recently become clear. Because the  $1/f$   
73 pattern is so prevalent across different types of systems, it was often regarded as a form of background  
74 noise, with limited functional significance (see He, 2014 for a review). However, in the last several  
75 decades, key studies have established a plausible physiological basis for the spectral slope (Freeman &

76 Zhai, 2009; He et al., 2010) and a growing number of functional correlates (Ouyang et al., 2020; Voytek  
77 et al., 2015).

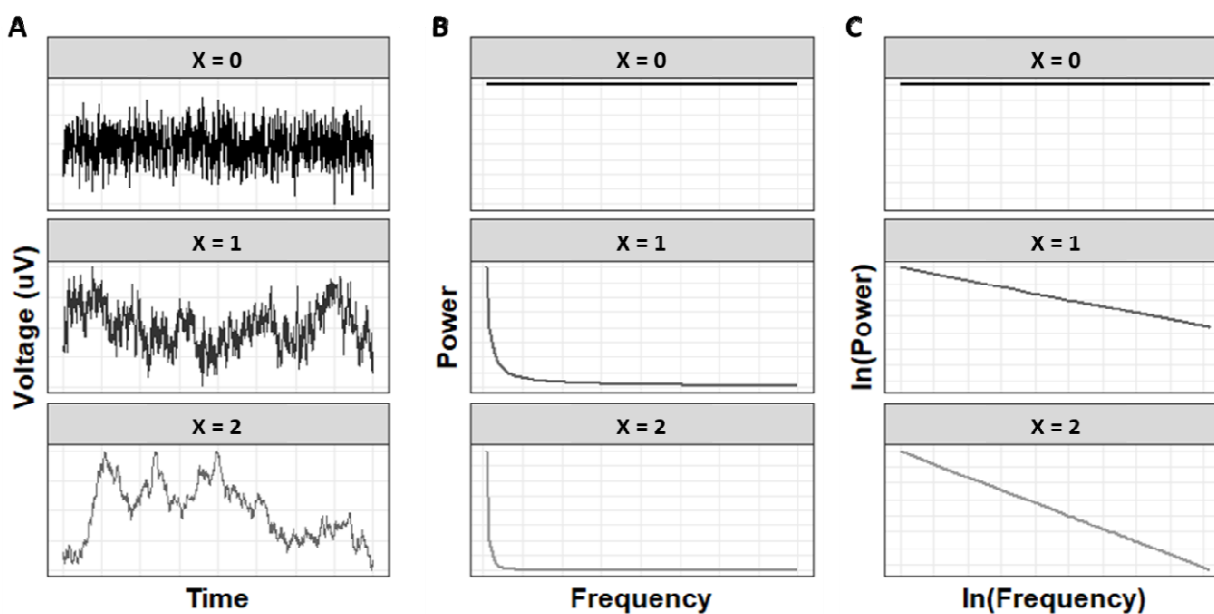

78  
79 **Figure 1.** Three different time-series of hypothetical electrophysiological data. (A) Voltages are shown  
80 over time. (B) Following a fast Fourier transform, an exponential function ( — ) is fit to the raw  
81 power spectrum. (C) By log-transforming the Power and the Frequency of the power spectrum, we can  
82 now approximate this relationship with a linear function ( — ). These  
83 transformations are shown for three different cases where the value of the exponent changes from 0  
84 (shown in black, representing “white” noise), to 1 (shown in dark grey, representing “pink” noise), to 2  
85 (shown in light grey, representing Brownian or “red” noise).

86

87

88           Most recently, studies have provided evidence that the spectral slope reflects the balance of  
89   excitation and inhibition (E:I) in the brain, such that flatter slopes indicate an increase in random  
90   excitatory spiking, a potential source of noise in the signal (Gao et al., 2017). Although those findings,  
91   and much of this literature, has involved invasive recordings from local field potentials or  
92   electrocorticography, more recent research has extended this to scalp EEG, demonstrating that  
93   anesthetic agents with known (and opposite) influences on excitation and inhibition modulate the  
94   spectral slope in the expected direction (Waschke et al., 2021). Other aspects of the electrophysiological  
95   power spectrum are increasingly understood as well, such as the relation of the spectral offset to  
96   neuronal firing rates (Manning et al., 2009), and the relation of the characteristic bend in the slope (the  
97   “knee” frequency) to the timescale of neural dynamics (Gao et al., 2020). This empirical work aligns with  
98   simulation studies, which have shown that the slope and other spectral features can be well-modelled  
99   as a function of local neuronal spikes and aggregate synaptic dynamics (Freeman & Zhai, 2009; Gao et  
100  al., 2020; Miller et al., 2009). Altogether, recent basic science on the spectral slope provides a  
101  compelling basis for considering it a viable index of neural noise (Tran et al., 2020).

## 102   **Functional and Age-Related Correlates of the Spectral Slope**

103           Simultaneous with these developments in understanding the mechanistic basis of the spectral  
104  slope, many studies have identified important functional correlates. For instance, the spectral slope has  
105  been observed to change across the lifespan (Dave et al., 2018; Donoghue et al., 2020; Schaworonkow &  
106  Voytek, 2021; Tran et al., 2020; Voytek & Knight, 2015), across a variety of tasks (Ouyang et al., 2020;  
107  Pathania et al., 2021; Voytek et al., 2015), across state-dependent variations in sleep (Freeman & Zhai,  
108  2009; Leemburg et al., 2018; Miskovic et al., 2019), and during anesthesia (Gao et al., 2017; Waschke et  
109  al., 2021). Furthermore, recent evidence points to the EEG spectral slope being a product of both fast  
110  networks representing the local dynamics and slow networks representing the more distributed  
111  recurrent connections. These two types of networks balance the excitation and inhibition to maximize

112 the information processing capabilities (Chaudhuri et al., 2018). Thus, the  $1/f$  component of the power  
113 spectrum is not only a slowly changing tonic signal, but an important physiological signal that can  
114 change quite quickly given the demands of a task and the state of an individual.

115         With respect to aging specifically, several recent studies have shown flattening of the spectral  
116 slope associated with differences in cognitive performance, or other aspects of brain functioning (Dave  
117 et al., 2018; McNair et al., 2019; Tran et al., 2020; Waschke et al., 2017). Voytek and colleagues (2015)  
118 conducted one of the first studies in this area, demonstrating that differences in the EEG spectral slope  
119 at rest were not only related to age differences in working memory performance, but the slope  
120 specifically *mediated* that effect. That is, older adults did not merely differ in both performance and  
121 slope values from younger adults, but the behavioral differences could be accounted for statistically by  
122 the slope effect alone. In the time since, many studies have replicated and expanded upon this basic  
123 effect. For example, in the neural domain, flatter slopes in older adults have been related to reductions  
124 in the amplitude of the N400 event-related potential (ERP) during language processing (Dave et al.,  
125 2018), delayed auditory P2 ERP latencies during tone discrimination (McNair et al., 2019), and changes  
126 in various measures of single-trial neural variability (Tran et al., 2020; Waschke et al., 2017).  
127 Behaviorally, some of these and other studies have linked flatter slopes in older adults to poorer  
128 performances on tasks of spatial attention (Tran et al., 2020) and visual-short-term memory (Thuwal et  
129 al., 2021). Still other work has linked changes in the spectral offset to poorer cognitive control across the  
130 adult age range (Clements et al., 2021), while spectral slope has been linked to speeded target detection  
131 in adults aged 40 and below (Ouyang et al., 2020).

132         Overall, these studies demonstrate a consistent pattern of flatter slopes in older adults, which  
133 are linked to changes in functioning across a variety of tasks, and in line with the neural noise  
134 hypothesis. Notwithstanding this progress, there are several outstanding questions, which if addressed,  
135 could further enhance understanding of the functional significance of the spectral slope. Largest among

136 these is the fact that, although the field as a whole has examined a range of tasks, to our knowledge, no  
137 single study has examined correlates of the spectral slope across a broad range of cognitive domains.  
138 This is important from the perspective of assessing the generality of spectral slope effects in aging, and  
139 the degree to which it may be more sensitive to declines in some functions than others (Dave et al.,  
140 2018, p. 40). In addition, prior studies that have examined cognitive correlates of the spectral slope have  
141 thus far focused on experimental tasks, as opposed to standardized measures, such as those used in  
142 neuropsychological assessment. Insofar as the spectral slope is of interest in terms of its translational  
143 potential as biomarker of age-related decline, it is beneficial to examine the degree to which variation in  
144 the slope relates to performance on tasks that have been validated for actual clinical decision-making.  
145 Thus, in light of these considerations, the primary goal of this study was to replicate and expand upon  
146 the prior findings relating flatter spectral slopes to cognitive performance declines in older adults, by  
147 using a larger battery of clinically validated cognitive tests. Following from the initial study by Voytek et  
148 al. (2015)—the only study to date which has demonstrated a mediating effect of the spectral slope—our  
149 primary hypothesis was that the slope of the EEG power spectrum (collected at rest), would mediate  
150 age-group differences in performance across diverse cognitive domains.

151

152



153 **Methods**

154 **Participants**

155 Forty-nine participants were recruited for the study: healthy young adults (YA; <35y; n=22);  
156 cognitively healthy older adults (OA; >59y; n=24); and older adults with mild cognitive impairment (MCI;  
157 n = 3) following approval of the University Institutional Review Board. We originally planned to recruit a  
158 comparable sample of older adults with amnesic MCI, which is considered a prodrome of Alzheimer's  
159 disease (Levey et al., 2006). This sample would allow for comparison of neurological changes between  
160 neurologically healthy older adults and those with MCI. Due to the onset of COVID-19 during data  
161 collection, however, we had to postpone data collection in older adults with MCI as a safety precaution.  
162 As a result, the n=3 older adults with amnesic MCI are excluded from statistical analyses, and our focus  
163 is solely on our primary aim comparing cognitively intact younger and older adults in the current sample.

164 Following informed consent, participants completed a demographic survey, wherein they self-  
165 reported their education status, handedness, current medical status, and physical activity status. Older  
166 adults also self-reported their concurrent medications and sleep quality using The Pittsburgh Sleep  
167 Quality Index (PSQI), but these data were not obtained for younger adults.

168 Participants over 18 were recruited and did not have any impairments that would limit the  
169 function of their arms, hand, or legs. Participants were recruited from the local community by flyers and  
170 word of mouth recruitment. Older adults specifically were also recruited through a participant database  
171 maintained by the Center on Aging at the University of Utah. Participants with MCI were recruited from  
172 an ongoing study by one of the coauthors (KD), a licensed neuropsychologist, who also provided their  
173 diagnosis for amnesic MCI. Participants were excluded if they had any self-reported musculoskeletal,  
174 neurological, or perceptual impairments that they thought would affect their performance in these  
175 tasks, or any history of skin allergies (as a precaution for EEG data collection). In addition, participants

176 were excluded if they had any medical history of severe cognitive impairment (e.g., dementia) or  
177 psychiatric conditions (e.g., severe depression, bipolar disorder, substance abuse).

## 178 **Tasks and Measures**

179 Participants completed a battery of cognitive and motor tasks: the RBANS to assess cognition, a  
180 maximum grip-force task, a simulated feeding task (Schaefer et al., 2015; Schaefer & Hengge, 2016), and  
181 a sensorimotor test of standing balance. However, to address our primary aim the current study focuses  
182 only on the resting EEG data and the behavioral data from the RBANS.

## 183 ***Cognitive Assessment***

184 **RBANS:** This individually-administered, paper and pencil battery has been validated to assess  
185 cognitive function in adults ages 20-89 (Randolph et al., 1998). It is a reliable and valid assessment of  
186 cognitive status for detecting dementia (Duff et al., 2008), discriminating among individual differences in  
187 healthy older adults (England et al., 2014; Patton et al., 2003), and in similarly aged clinical populations  
188 (Larson et al., 2005). Furthermore, there is good evidence of convergent validity to show that RBANS  
189 scores are associated with instrumental activities of daily living (Freilich & Hyer, 2007; Larson et al.,  
190 2005). The RBANS consists of 12 subtests that load onto 5 indices of various cognitive domains:  
191 immediate memory, visuospatial/constructional ability, language, attention, and delayed memory. To  
192 ensure consistency of scoring, all tests were scored by the same author, AP. Although age-corrected  
193 normative data is available, we elected to use non-age-corrected raw scores so that we could compare  
194 age-groups on their absolute performance (rather than performance relative to age-matched peers).

## 195 **EEG Processing and Aggregation**

196 Scalp EEG was collected from a 32-channel actiCAP active electrode system housed in a 64-  
197 channel cap and amplified with a BrainAmp DC amplifier (BrainProducts GmbH). The resting EEG data  
198 was collected for two minutes in each of two different conditions; eyes open and eyes closed. To reduce  
199 the potential for artifacts and make the parameterization of the power spectrum easier, we a priori

200 chose to analyze only on data from eyes-closed rest. Participants were seated in each condition and  
201 instructed to, “Clear their minds and relax”. In the eyes open condition, all participants were oriented  
202 towards a fixation cross that was taped to a white wall approximately 2m away. The electrodes were  
203 labelled in accordance with the standard 10-10 geodesic montage (Oostenveld & Praamstra, 2001). The  
204 specific electrode sites included, Fp1, Fz, F3, F7, FT9, FC5, FC1, C3, T7, TP9, CP5, CP1, Pz, P3, P7, O1, Oz,  
205 O2, P4, P8, TP10, CP6, CP2, Cz, C4, T8, FT10, FC6, FC2, F4, F8, and Fp2. The data were online referenced  
206 to the right ear, with a common ground on the left ear. The electrode impedances were maintained  
207 below 25k $\Omega$ , with a sampling frequency of 1000Hz.

208 EEG data processing was conducted with the BrainVision Analyzer 2.1.2 software (BrainProducts  
209 GmbH). No online filters were applied, but offline the data were band-pass filtered between 0.1 and 40  
210 Hz with 24-dB rolloffs with a 60 Hz notch filter. The data were manually inspected, and eyeblinks marked  
211 for ICA-based ocular correction within BrainVision Analyzer software (BrainProducts 2013). This function  
212 was run with the FP2 electrode serving as the VEOG and the HEOG electrode. Using Welch’s method,  
213 the data were epoched in 1-s segments, which overlapped by 50%. Following that, segments with  
214 artifacts were removed (average of 91% segments retained per person, SD = 6.73%). The remaining  
215 segments were subjected to a fast Fourier transformation using 0.977 Hz bins and a Hamming window  
216 with a 50% taper (Welch, 1967). The data were then truncated between 2-25 Hz to exclude gamma-  
217 band power and higher frequency muscle activation and were then averaged within sets of electrodes to  
218 get the average power spectrum in each region (Frontal: F7, F3, Fz, F4, F8; Central: C3, Cz, C4; Parietal:  
219 P7, P3, Pz, P4, P8; and Occipital: O1, Oz, O2).

#### 220 **Calculation of the Exponent and Offsets**

221 To compute the exponents and offsets for each participant, we used the spectral  
222 parameterization algorithm (*specparam* toolbox), which decomposes the power spectral density into  
223 the aperiodic background (exponent and offset) and the periodic peaks (Donoghue et al., 2020). The

224 code for this algorithm is available as an open source *specparam* toolbox (<https://fooof-tools.github.io/>).

225 The data were truncated to 2-25 Hz, and the *offsets* and *exponent* were extracted from the average

226 power spectrum in each brain region for each participant. To ensure consistency of data processing, the

227 EEG data was parametrized with the “*aperiodic\_mode*” set at ‘fixed’, the width the peaks limited to 8,

228 and the minimum peak height set to 0.05. The choice of parameters led to a median  $r^2 = 0.96$ ,

229 IQR=[0.92,0.98] across all regions. Thus, although other processing parameters could have been chosen,

230 we achieved good spectral parameterization across participants and regions.

### 231 **Statistical Analysis**

232 All statistical analyses were conducted in R v4.1.0 (R Core Team, 2021; R Studio Team, 2020;

233 Wickham et al., 2019). Following the extraction of the exponents and offsets, we used mixed-effects

234 regression (Bates et al., 2014), with fixed effects of age-group and brain region, and their interactions. A

235 random effect of Subject accounted for the within-subject nature of the Region factor.

236 To assess age-group differences in cognitive performance, we used independent samples t-tests

237 to compare performance on the raw RBANS scores between age groups. *A priori*, we chose to conduct

238 one-tailed tests as past data strongly suggest that older adults should generally score worse than

239 younger adults. We tested the effect of age-group for RBANS domain-composite scores, calculated from

240 the percentage of the maximum possible score on each subtest. Note that this is a departure from the

241 way RBANS scores are normally analyzed, which requires age-normalizing the scores. Because our

242 planned analyses require us to test the effect of age and then its (potential) mediation, we chose not to

243 age-normalize the RBANS scores. Thus, we focus on the full RBANS composite score (percentile scores

244 averaged across all domains) and domain composite scores (percentile scores combining subtests in

245 each domain).

246 Finally, we used mediation analysis with non-parametric bootstrapping to assess the mediating

247 effect of the exponent on age-related declines in cognition (Imai et al., 2010; Tingley et al., 2014). A

248 *priori*, we chose to focus on the exponents from the frontal electrodes only, reflecting our interest in  
249 higher cognitive function. The exponents were extracted from the *specparam* toolbox (one frontal  
250 exponent value for each participant) and then used as a mediator in a series of regression models.  
251 Cognitive domain performance was regressed onto age-group, the exponent was regressed onto age  
252 group, and cognitive test performance was regressed onto age-group and the exponent. Using k=5,000  
253 iterations, these models were bootstrapped to estimate the total effect, the average direct effect, and  
254 the average mediation effect.

255 To ensure reproducibility, de-identified EEG and behavioral data, plus all analysis code are  
256 available from the corresponding author's GitHub account  
257 ([https://github.com/keithlohse/spectral\\_slopes\\_aging](https://github.com/keithlohse/spectral_slopes_aging)).

258

## 259 Results

### 260 Demographics

261 Forty-nine participants were recruited from within the university and the larger community.  
262 However, due to a data storage issue, we lost EEG data for one YA participant, bringing our total YA  
263 n=21, and one OA participant, bringing our total OA n=23. Demographic statistics for these participants  
264 are shown in Table 1. Data from the n=3 older adults with MCI were too limited to include in statistical  
265 analyses. All subsequent analyses are based on the N=44 cognitively intact older and younger adults.

266

267 **Table 1.** Summary statistics for the participant demographic surveys.

| <b>Variable</b>                     | <b>Younger Adults</b> | <b>Older Adults</b> |
|-------------------------------------|-----------------------|---------------------|
| Participants (n)                    | 21                    | 23                  |
| Age, mean (SD)                      | 23.29(3.47)           | 70.83(5.77)         |
| Age, range                          | 19, 33                | 59, 83              |
| Male (n)                            | 11                    | 4                   |
| Education level (years), mean (SD)  | 14.93 (1.58)          | 15.45(2.61)         |
| # of Current Medications            | <i>Not Collected</i>  | 1 to 23             |
| No. of medications, mean (SD)       | <i>Not Collected</i>  | 5.55(5.26)          |
| Average Maximum Grip Force (kgf)    | 20.5 (6.5)            | 12.4 (4.2)          |
| Self-Reported Physical Activity     |                       |                     |
| Vigorous PA (Days per week)         | 2.98(1.75)            | 2.22(2.33)          |
| Vigorous PA (Hours per day)         | 1.21(0.64)            | 0.87(0.91)          |
| Moderate PA (Days per week)         | 3.67(1.72)            | 4.15(2.52)          |
| Moderate PA (Hours per day)         | 1.42(0.83)            | 1.51(1.22)          |
| Light PA (Days per week)            | 5.76(2.12)            | 5.43(2.42)          |
| Light PA (Hours per day)            | 3.74(3.15)            | 2.91(2.08)          |
| Resistance training (Days per week) | 2.52(2.09)            | 1.17(1.59)          |
| Sleep Quality, mean (SD)            | <i>Not Collected</i>  | 5.33(3.57)          |

268 Note that details of medications taken and the Pittsburgh Sleep Quality Index were only added to the  
269 study protocol after data collection in the younger adults was finished. As such, these data are only  
270 available for the older adults.

271 **Age-Related Differences in EEG Power Spectra**

272 To measure age-related changes in the exponent in different brain regions, a linear mixed-effect  
273 regression model with fixed effects of age-group and brain region, and their interactions revealed a  
274 significant main effect of Age-Group ( $F(1,44) = 12.56, p < 0.001$ ) and brain Region ( $F(3,132) = 8.70, p <$   
275  $0.001$ ). These effects were superseded by the Age-Group x Region interaction ( $F(3,132) = 10.09, p <$   
276  $0.001$ ). To decompose this interaction, we subset the data into regions, and performed linear  
277 regressions with fixed-effects of Age-Group.

278 In the frontal region, there was a significant main effect of Age-Group,  $F(1,42)=13.28, p <0.001$ .  
279 The exponents in the frontal region were lower in older adults (i.e., flatter power spectra) as compared  
280 to the younger adults, see Figure 2B.

281 In the central region, there was a there was a significant main effect of Age-Group,  
282  $F(1,42)=22.00, p <0.001$ . The exponents in the central region were reliably lower in older adults as  
283 compared to the younger adults, see Figure 2B.

284 In the parietal region, there was a there was a significant main effect of Age-Group,  
285  $F(1,42)=9.24, p = 0.004$ . The exponents in the parietal region were reliably lower in older adults as  
286 compared to the younger adults. In the occipital region, however, no significant effect of Age-Group was  
287 observed,  $F(1,42) = 1.71, p = 0.198$ . Both results are shown in Figure 2B

288

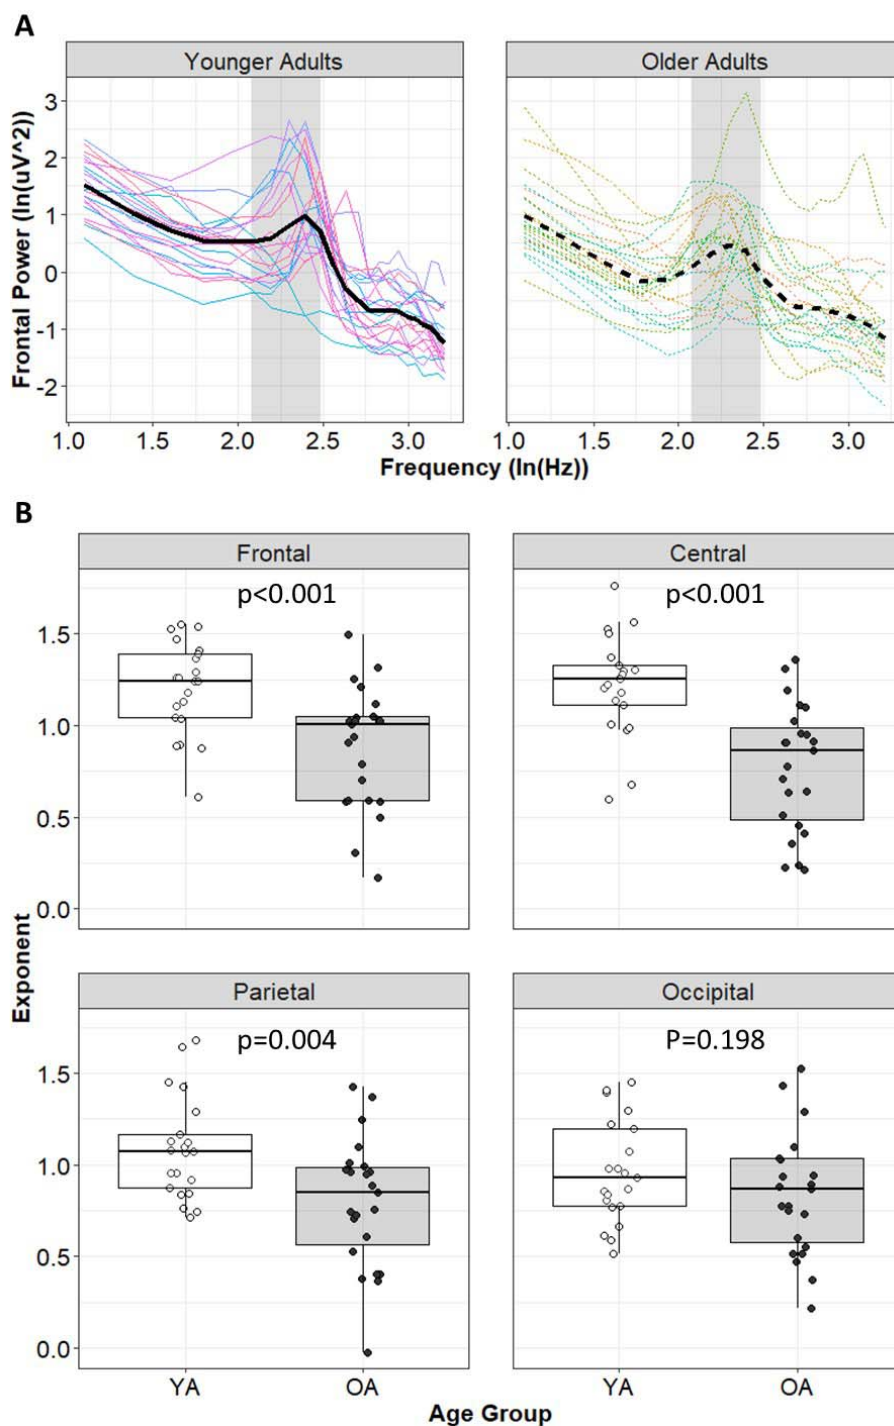

289

290 **Figure 2.** (A) Average power spectra across the frontal electrodes (F7, F3, Fz, F4, F8) as function of age-  
291 age group, shown in log-log space. Thin colored lines show individuals, thicker black lines show the average  
292 power spectra for the whole group (line dashing varies with group). (B) Estimated exponents from each  
293 region as a function of age group. P-values are based on a linear model regressing exponents onto a  
294 contrast coded age group variable in each region. YA = younger adults; OA = older adults. The canonical  
295 alpha band (8-12 Hz) is highlighted in Panel A.  
296



297 **Age-Related Differences in Cognition**

298           As shown in Figure 3, there was considerable variability both within and between groups on the  
299 different scales of the RBANS. For the RBANS composite score, there was a statistically significant  
300 difference between younger and older adults ( $t(41.6) = -1.87, p=0.034$ ), with older adults performing  
301 worse ( $d=-0.40$ ). Delving into the specific cognitive domains of the RBANS, only Attention ( $t(38.1) = -$   
302  $2.86, p = 0.003, d=-0.61$ ) and Delayed Memory ( $t(41.8) = -1.84, p=0.036, d=-0.39$ ) showed statistically  
303 significant differences, whereas differences for Immediate Memory ( $t(40.3)=-0.38, p = 0.353, d=-0.08$ ),  
304 Visuospatial/Constructional ability ( $t(42.0)=-1.01, p = 0.158, d=-0.21$ ), and Language ( $t(39.7) = 0.62, p =$   
305  $0.730, d=0.13$ ) were not statistically significant.

306

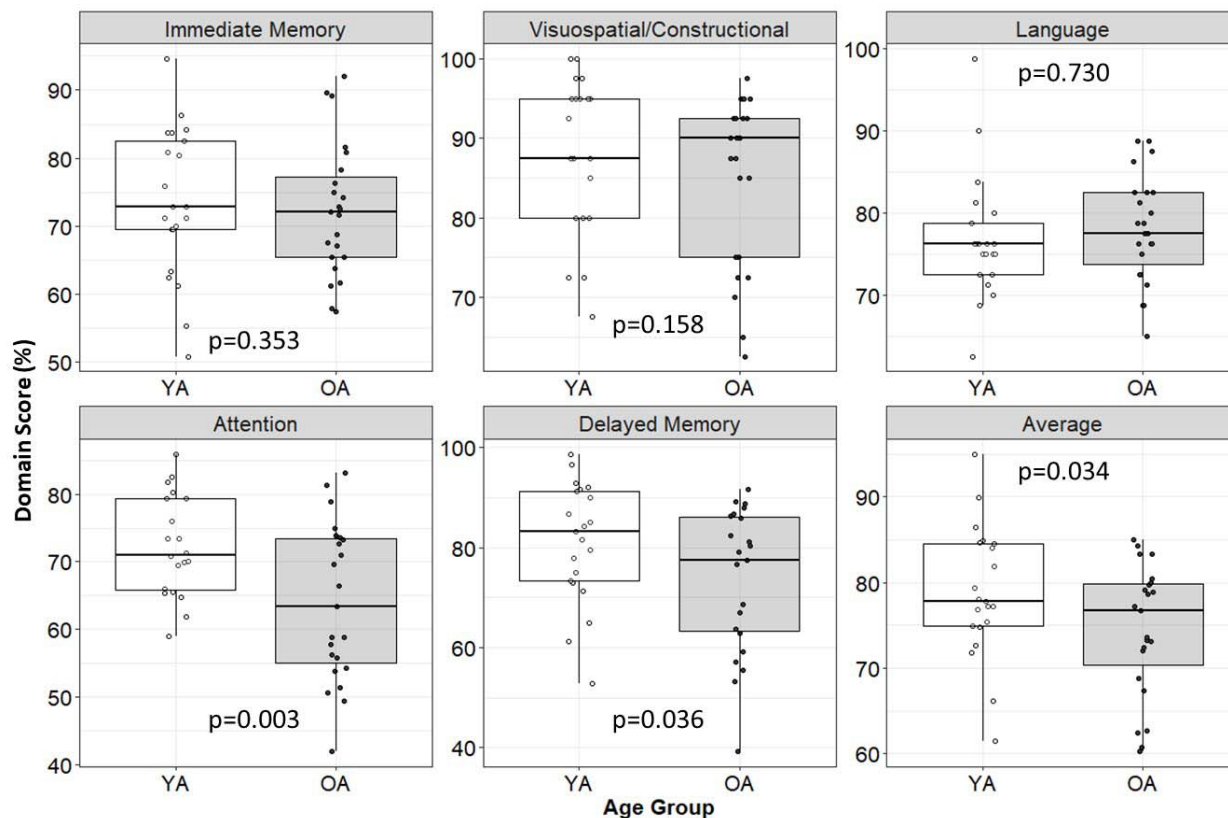

307

308 **Figure 3.** RBANS scores for each cognitive domain as a function of group: Immediate memory,  
309 Visuospatial/ Constructional abilities, Language, Attention, and Delayed Memory. P-values are based on  
310 directional Welch's Two Sample t-test (not assuming equal variances), where  $H_0: OA \geq YA$ . YA =  
311 younger adults; OA = older adults.

312 **Does the spectral slope mediate age-related changes in cognition?**

313 Given our *a priori* predictions, exponents from the frontal region were tested as potential  
314 mediators for age-group differences in the RBANS. As shown in Table 2, we tested only those RBANS  
315 scales that showed statistically significant differences between age-groups. Contrary to our predictions,  
316 neither total RBANS scores ( $p=0.170$ ), the Delayed Memory domain ( $p=0.183$ ), nor the Attention domain  
317 ( $p=0.259$ ) showed a statistically significant mediation effect. See Figure 4A-C.

318 In an earlier version of these analyses published in a pre-print (Pathania, Clark, et al., 2021), we  
319 did find evidence of statistically significant mediations. However, those analyses used regression-based  
320 methods to estimate the slope of power spectrum (rather than spectral parameterization) and analyzed  
321 the RBANS at the level of specific subtests rather than scales. To better understand these discrepant

322 results, we focused on the Attention scale, which showed the largest age-related differences, and ran  
323 mediation analyses on its constituent subtests: the Coding test and the Digit Span test (see Figure 4D  
324 and E). As shown in Table 2, there was evidence of mediation for the Coding subtest ( $p=0.034$ ), but not  
325 for the Digit Span subtest ( $p=0.800$ ). Thus, across our pre-print and the current analysis, there was  
326 evidence that the exponent of the frontal power spectrum mediated age-related differences in the  
327 coding subscale. This suggests that the mediation is not an artifact of the method of estimation  
328 (regression in the pre-print, spectral parameterization here) and is instead something unique about the  
329 Coding subtest that is not shared with the Digit Span.

330

331

332 **Table 2.** Testing the exponent of the power spectrum as a mediator of age-related differences using  
333 non-parametric bootstrapping to estimate mediation effects.

| Dependent Variable        | Total Effect |         | Direct Effect |         | Average Mediation Effect |         |
|---------------------------|--------------|---------|---------------|---------|--------------------------|---------|
|                           | Estimate     | p-value | Estimate      | p-value | Estimate                 | p-value |
| Average (%)               | 4.34         | 0.050   | 2.50          | 0.340   | 1.84                     | 0.170   |
| Delayed Memory (%)        | 7.29         | 0.057   | 4.04          | 0.378   | 3.25                     | 0.183   |
| Attention (%)             | 8.36         | 0.003   | 6.29          | 0.070   | 2.06                     | 0.259   |
| -- Coding Subtest (%)     | 17.32        | <0.001  | 13.92         | <0.001  | 3.40                     | 0.034   |
| -- Digit Span Subtest (%) | -0.61        | 0.860   | -1.34         | 0.800   | 0.73                     | 0.800   |

334 \*Note that the total effect reflects the effect of both the grouping variable (Age Group) and the  
335 mediator (spectral power Exponent) on the outcome (domains of cognition). The direct effect is the  
336 effect of the group variable with the mediator removed, and the mediation effect is a statistical test of  
337 the exponent as a mediator.

338

339

340

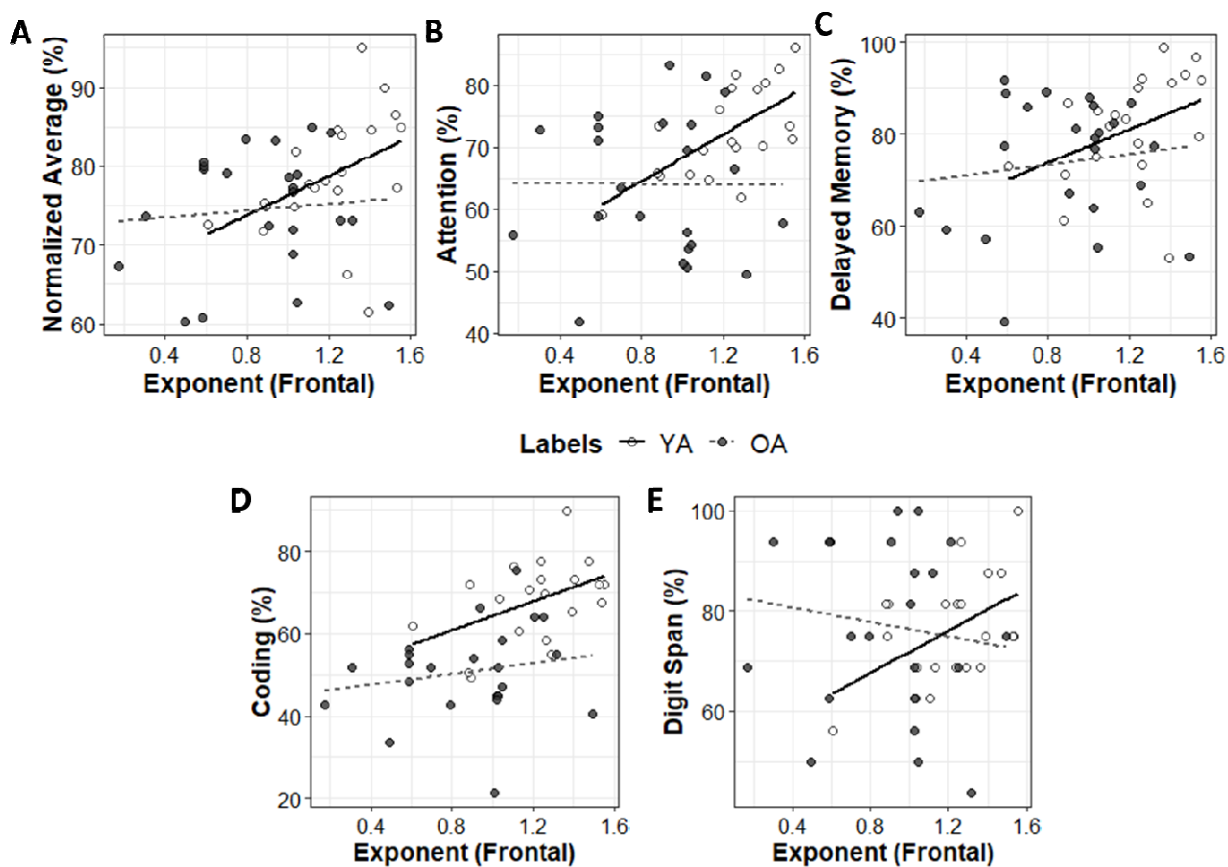

341

342 **Figure 4.** RBANS total (A), Attention domain (B), Delayed Memory domain (C), Coding subtest (D), and  
343 Digit Span subtest (E) scores as a function of the spectral slope across the frontal electrodes. These  
344 subtests were selected for the statistically significant differences between younger (YA) and older adults  
345 (OA) shown in Figure 3. Lines indicate the ordinary least squares regression line within each group.  
346

347 **Discussion**

348 Consistent with the neural-noise hypothesis of aging, our data showed that (1) the slope of the  
349 resting EEG power spectrum is flatter in older compared to younger adults (replicating past work) and  
350 (2) individual differences in the slope of the EEG power spectrum mediated age-related differences in a  
351 clinically validated assessment of information processing speed (extending past work). However, it is  
352 important to note that this pattern was not evident across the five different domains of the RBANS.  
353 Contrary to our predictions, none of the RBANS domains showed a reliable mediation effect. Since the  
354 Attention domain showed the largest age-related differences, we performed mediation analysis with its  
355 constituent subscales, Coding and Digit Span. The effect was apparent only in the Coding subtest. Other  
356 domains/subtests of the RBANS were not examined, as we did not find reliable evidence of cognitive  
357 differences between the performance of younger adults and older adults. Thus, combining the current  
358 data with past work, it appears that the flattening of the exponent with age is a reliable effect (Tran et  
359 al., 2020; Voytek et al., 2015; Waschke et al., 2017). Further, the exponent is related to cognition not  
360 only in tightly controlled laboratory tasks (Thuwal et al., 2021, Tran et al., 2020; Voytek et al., 2015), but  
361 also in validated clinical tests (the Coding subtest of the RBANS in the present data).

362 The obtained pattern of results raises important questions about how the findings pertaining to  
363 Coding subtest of the RBANS should be interpreted. The Coding subtest falls under the “Attention”  
364 domain. Interestingly, the Digit Span is the other subtest in the Attention domain, and we found no  
365 evidence of a mediation effect with respect to Digit Span scores. Ultimately, the reason for the strong  
366 association with the Coding subtest is not clear, but we posit a few possible (non-exclusive)  
367 explanations. First, the Coding subtest has the strictest time requirements of any subtest on the RBANS,  
368 and is directly analogous to other symbol substitution tasks that are commonly used to assess  
369 processing speed in neuropsychology (Larrabee, 2017). To perform the task efficiently, participants need  
370 to memorize the correspondence between symbols presented on the paper and the numbers those

371 symbols represent (i.e., a symbol-number pairing). As the task goes on, more efficient participants are  
372 able to encode the symbol-number pairings into working memory, as opposed to repeatedly alternating  
373 between the symbol key and the response field. Thus, these tasks require the rapid integration of  
374 various sub-processes, including visual scanning, working memory, sustained attention, and visuomotor  
375 coordination, and consequently quantify an individual's ability to rapidly learn, coordinate, and execute  
376 a set of simpler sub-tasks (Lezak et al., 2004).

377         A second, perhaps complementary, perspective on these measures highlights the importance of  
378 executive functions, via cognitive control and working memory, in allowing individuals to rapidly  
379 coordinate the necessary sub-processes when faced with a novel task and timed testing conditions  
380 (Koziol & Budding, 2009). Both of these perspectives are consistent with the large literatures that  
381 highlight: (1) the relative prominence of changes in the (interrelated) functions of processing speed,  
382 working memory, and fluid cognition with greater age (Salthouse & Davis, 2006), and (2) the effects of  
383 clinical conditions affecting distributed processing and/or white matter integrity on timed symbol-  
384 substitution tasks (e.g., DeLuca et al., 2004; Kinnunen et al., 2011; Lezak et al., 2004).

385         Interestingly, we did not find evidence for the exponent mediating age-related differences in  
386 delayed memory. From these pilot data, we cannot conclude that there is no relationship between  
387 exponents and delayed memory, but we found no evidence for a mediating effect in the current sample.  
388 There are several reasons why there might be no evidence of mediation in delayed memory despite a  
389 relatively large age-related difference. It could be that there truly is no mediating effect in delayed  
390 memory in the population or it could be that there is an effect but we lacked the power to detect it. This  
391 second option is an important consideration because in the present sample the Attention domain  
392 showed the largest age-related differences. If differences in other domains were larger (i.e., between  
393 group variance increased or within group variation reduced) that would increase the power to detect a

394 mediation if one exists in that domain. At present, however, we only find evidence of a mediation effect  
395 for the Coding subtest, which leans most heavily on speeded information processing.

396 Finally, it is unfortunate that we were unable to collect data from our sample of older adults  
397 with MCI. The descriptive data for three participants are interesting, but far too limited to allow a  
398 substantial qualitative interpretation. Based on the relationship between resting EEG exponents and  
399 performance in cognitively intact older adults, however, we do think that these pilot data warrant  
400 further research into the clinical utility of the resting spectral slope as a biomarker of cognitive decline.  
401 We have shown that resting EEG exponents are sensitive to individual differences in some aspects of  
402 cognition. Combined with past work showing how frequency-based EEG measures can longitudinally  
403 predict the conversion from MCI to Alzheimer's disease (Engedal et al., 2020; Poil et al., 2013), we think  
404 the present data warrant longitudinal studies to see if the EEG exponents possibly outperform other  
405 biomarkers, or if the predictive utility of other biomarkers is improved after accounting for the EEG  
406 exponent/offset (Donoghue et al., 2020).

407

#### 408 **Limitations**

409 There are a number of limitations in the present study of which we need to be cognizant. First  
410 and foremost, we have a limited sample size and we need to be careful in the interpretation of our  
411 hypothesis test results. Due to relatively low power in some analyses, significant results may not be  
412 representative of the real underlying effects, and non-significant results may have simply lacked  
413 adequate statistical power (Button et al., 2013; Lohse et al., 2016). Finally, although the RBANS does tap  
414 multiple cognitive domains, it does not have pure measures of executive functioning. Given the present  
415 results, future studies might examine if executive function specifically is influenced by age and spectral  
416 slope.

417



418 **Conclusions**

419           Consistent with the neural-noise hypothesis of aging, we replicated earlier work showing that  
420 the resting EEG exponents become flatter with age and that individual differences in the exponents  
421 explain individual differences in cognition. We also extend this past work by demonstrating these effects  
422 in clinically validated assessments of cognitive status. However, the mediation effect was only present in  
423 a test of information processing speed, suggesting that these effects are not broadly applicable to all  
424 areas of cognition.

## References

- Andrews, G., Clark, M., & Luszcz, M. (2002). Successful Aging in the Australian Longitudinal Study of Aging: Applying the MacArthur Model Cross-Nationally. *Journal of Social Issues, 58*(4), 749–765. <https://doi.org/10.1111/1540-4560.00288>
- Bäckman, L., Nyberg, L., Lindenberger, U., Li, S.-C., & Farde, L. (2006). The correlative triad among aging, dopamine, and cognition: Current status and future prospects. *Neuroscience & Biobehavioral Reviews, 30*(6), 791–807. <https://doi.org/10.1016/j.neubiorev.2006.06.005>
- Bates, D., Mächler, M., Bolker, B., & Walker, S. (2014). Fitting Linear Mixed-Effects Models using lme4. *ArXiv:1406.5823 [Stat]*. <http://arxiv.org/abs/1406.5823>
- Buckner, R. L. (2004). Memory and Executive Function in Aging and AD: Multiple Factors that Cause Decline and Reserve Factors that Compensate. *Neuron, 44*(1), 195–208. <https://doi.org/10.1016/j.neuron.2004.09.006>
- Button, K. S., Ioannidis, J. P. A., Mokrysz, C., Nosek, B. A., Flint, J., Robinson, E. S. J., & Munafò, M. R. (2013). Power failure: Why small sample size undermines the reliability of neuroscience. *Nature Reviews Neuroscience, 14*(5), 365–376. <https://doi.org/10.1038/nrn3475>
- Cabeza, R., Nyberg, L., & Park, D. C. (2016). *Cognitive Neuroscience of Aging: Linking Cognitive and Cerebral Aging*. Oxford University Press.
- Chaudhuri, R., He, B. J., & Wang, X.-J. (2018). Random Recurrent Networks Near Criticality Capture the Broadband Power Distribution of Human ECoG Dynamics. *Cerebral Cortex (New York, N.Y.: 1991), 28*(10), 3610–3622. <https://doi.org/10.1093/cercor/bhx233>
- Clements, G. M., Bowie, D. C., Gyurkovics, M., Low, K. A., Fabiani, M., & Gratton, G. (2021). Spontaneous alpha and theta oscillations are related to complementary aspects of cognitive control in younger and older adults. *Frontiers in Human Neuroscience, 15*, 106.
- Cohen, M. X. (2014). Fluctuations in Oscillation Frequency Control Spike Timing and Coordinate Neural Networks. *Journal of Neuroscience, 34*(27), 8988–8998. <https://doi.org/10.1523/JNEUROSCI.0261-14.2014>
- Cremer, R., & Zeef, E. J. (1987). What Kind of Noise Increases With Age? *Journal of Gerontology, 42*(5), 515–518. <https://doi.org/10.1093/geronj/42.5.515>
- Dave, S., Brothers, T. A., & Swaab, T. Y. (2018). 1/f neural noise and electrophysiological indices of contextual prediction in aging. *Brain Research, 1691*, 34–43. <https://doi.org/10.1016/j.brainres.2018.04.007>
- Dekhtyar, M., Papp, K. V., Buckley, R., Jacobs, H. I. L., Schultz, A. P., Johnson, K. A., Sperling, R. A., & Rentz, D. M. (2017). Neuroimaging markers associated with maintenance of optimal memory performance in late-life. *Neuropsychologia, 100*, 164–170. <https://doi.org/10.1016/j.neuropsychologia.2017.04.037>
- DeLuca, J., Chelune, G. J., Tulskey, D. S., Lengenfelder, J., & Chiaravalloti, N. D. (2004). Is Speed of Processing or Working Memory the Primary Information Processing Deficit in Multiple Sclerosis? *Journal of Clinical and Experimental Neuropsychology, 26*(4), 550–562. <https://doi.org/10.1080/13803390490496641>

- Donoghue, T., Haller, M., Peterson, E. J., Varma, P., Sebastian, P., Gao, R., Noto, T., Lara, A. H., Wallis, J. D., Knight, R. T., Shestyuk, A., & Voytek, B. (2020). Parameterizing neural power spectra into periodic and aperiodic components. *Nature Neuroscience*, *23*(12), 1655–1665. <https://doi.org/10.1038/s41593-020-00744-x>
- Duff, K., Clark, H. J. D., O’Bryant, S. E., Mold, J. W., Schiffer, R. B., & Sutker, P. B. (2008). Utility of the RBANS in detecting cognitive impairment associated with Alzheimer’s disease: Sensitivity, specificity, and positive and negative predictive powers. *Archives of Clinical Neuropsychology*, *23*(5), 603–612. <https://doi.org/10.1016/j.acn.2008.06.004>
- Engedal, K., Barca, M. L., Høgh, P., Bo Andersen, B., Winther Dombernowsky, N., Naik, M., Gudmundsson, T. E., Øksengaard, A.-R., Wahlund, L.-O., & Snaedal, J. (2020). The Power of EEG to Predict Conversion from Mild Cognitive Impairment and Subjective Cognitive Decline to Dementia. *Dementia and Geriatric Cognitive Disorders*, *49*(1), 38–47. <https://doi.org/10.1159/000508392>
- England, H. B., Gillis, M. M., & Hampstead, B. M. (2014). RBANS Memory Indices Are Related to Medial Temporal Lobe Volumetrics in Healthy Older Adults and Those with Mild Cognitive Impairment. *Archives of Clinical Neuropsychology*, *29*(4), 322–328. <https://doi.org/10.1093/arclin/acu012>
- Fiske, A., Wetherell, J. L., & Gatz, M. (2009). Depression in Older Adults. *Annual Review of Clinical Psychology*, *5*(1), 363–389. <https://doi.org/10.1146/annurev.clinpsy.032408.153621>
- Freeman, W. J., & Zhai, J. (2009). Simulated power spectral density (PSD) of background electrocorticogram (ECoG). *Cognitive Neurodynamics*, *3*(1), 97–103. <https://doi.org/10.1007/s11571-008-9064-y>
- Freilich, B. M., & Hyer, L. A. (2007). Relation of the Repeatable Battery for Assessment of Neuropsychological Status to Measures of Daily Functioning in Dementia. *Psychological Reports*, *101*(1), 119–129. <https://doi.org/10.2466/pr0.101.1.119-129>
- Gao, R., Peterson, E. J., & Voytek, B. (2017). Inferring synaptic excitation/inhibition balance from field potentials. *NeuroImage*, *158*, 70–78. <https://doi.org/10.1016/j.neuroimage.2017.06.078>
- Gao, R., van den Brink, R. L., Pfeffer, T., & Voytek, B. (2020). Neuronal timescales are functionally dynamic and shaped by cortical microarchitecture. *Elife*, *9*, e61277.
- Gilden, D. L., Thornton, T., & Mallon, M. W. (1995). 1/f noise in human cognition. *Science*, *267*(5205), 1837–1839. <https://doi.org/10.1126/science.7892611>
- Habib, R., Nyberg, L., & Nilsson, L.-G. (2007). Cognitive and Non-Cognitive Factors Contributing to the Longitudinal Identification of Successful Older Adults in the Betula Study. *Aging, Neuropsychology, and Cognition*, *14*(3), 257–273. <https://doi.org/10.1080/13825580600582412>
- Harada, C. N., Natelson Love, M. C., & Triebel, K. (2013). Normal Cognitive Aging. *Clinics in Geriatric Medicine*, *29*(4), 737–752. <https://doi.org/10.1016/j.cger.2013.07.002>
- He, B. J. (2014). Scale-free brain activity: Past, present, and future. *Trends in Cognitive Sciences*, *18*(9), 480–487. <https://doi.org/10.1016/j.tics.2014.04.003>

- He, B. J., Zempel, J. M., Snyder, A. Z., & Raichle, M. E. (2010). The Temporal Structures and Functional Significance of Scale-free Brain Activity. *Neuron*, *66*(3), 353–369. <https://doi.org/10.1016/j.neuron.2010.04.020>
- Hedden, T., & Gabrieli, J. D. E. (2004). Insights into the ageing mind: A view from cognitive neuroscience. *Nature Reviews Neuroscience*, *5*(2), 87–96. <https://doi.org/10.1038/nrn1323>
- Hickmott, P., & Dinse, H. (2013). Effects of Aging on Properties of the Local Circuit in Rat Primary Somatosensory Cortex (S1) In Vitro. *Cerebral Cortex*, *23*(10), 2500–2513. <https://doi.org/10.1093/cercor/bhs248>
- Holliger, K. (1996). Fault scaling and 1/f noise scaling of seismic velocity fluctuations in the upper crystalline crust. *Geology*, *24*(12), 1103–1106. [https://doi.org/10.1130/0091-7613\(1996\)024<1103:FSAFNS>2.3.CO;2](https://doi.org/10.1130/0091-7613(1996)024<1103:FSAFNS>2.3.CO;2)
- Imai, K., Keele, L., & Tingley, D. (2010). A general approach to causal mediation analysis. *Psychological Methods*, *15*(4), 309–334. <https://doi.org/10.1037/a0020761>
- Kinnunen, K. M., Greenwood, R., Powell, J. H., Leech, R., Hawkins, P. C., Bonnelle, V., Patel, M. C., Counsell, S. J., & Sharp, D. J. (2011). White matter damage and cognitive impairment after traumatic brain injury. *Brain*, *134*(2), 449–463. <https://doi.org/10.1093/brain/awq347>
- Koziol, L. F., & Budding, D. E. (2009). *Subcortical Structures and Cognition: Implications for Neuropsychological Assessment*. Springer Science & Business Media.
- Larrabee, G. J. (2017). Psychometric Foundations of Neuropsychological Assessment. In *Textbook of Clinical Neuropsychology* (2nd ed.). Taylor & Francis.
- Larson, E. B., Kirschner, K., Bode, R., Heinemann, A., & Goodman, R. (2005). Construct and Predictive Validity of the Repeatable Battery for the Assessment of Neuropsychological Status in the Evaluation of Stroke Patients. *Journal of Clinical and Experimental Neuropsychology*, *27*(1), 16–32. <https://doi.org/10.1080/138033990513564>
- Leemburg, S., Gao, B., Cam, E., Sarnthein, J., & Bassetti, C. L. (2018). Power spectrum slope is related to motor function after focal cerebral ischemia in the rat. *Sleep*, *41*(zsy132). <https://doi.org/10.1093/sleep/zsy132>
- Lezak, P. of N. P. and N. M. D., Lezak, M. D., Howieson, A. P. of N. and P. D. B., Howieson, D. B., Loring, P. of N. D. W., Loring, D. W., & Fischer, J. S. (2004). *Neuropsychological Assessment*. Oxford University Press.
- Lindenberger, U. (2014). Human cognitive aging: Corriger la fortune? *Science*, *346*(6209), 572–578. <https://doi.org/10.1126/science.1254403>
- Lohse, K., Buchanan, T., & Miller, M. (2016). Underpowered and Overworked: Problems With Data Analysis in Motor Learning Studies. *Journal of Motor Learning and Development*, *4*(1), 37–58. <https://doi.org/10.1123/jmld.2015-0010>
- Manning, J. R., Jacobs, J., Fried, I., & Kahana, M. J. (2009). Broadband Shifts in Local Field Potential Power Spectra Are Correlated with Single-Neuron Spiking in Humans. *Journal of Neuroscience*, *29*(43), 13613–13620. <https://doi.org/10.1523/JNEUROSCI.2041-09.2009>
- McNair, S. W., Kayser, S. J., & Kayser, C. (2019). Consistent pre-stimulus influences on auditory perception across the lifespan. *NeuroImage*, *186*, 22–32. <https://doi.org/10.1016/j.neuroimage.2018.10.085>

- Miller, K. J., Sorensen, L. B., Ojemann, J. G., & Nijs, M. den. (2009). Power-Law Scaling in the Brain Surface Electric Potential. *PLOS Computational Biology*, 5(12), e1000609. <https://doi.org/10.1371/journal.pcbi.1000609>
- Miskovic, V., MacDonald, K. J., Rhodes, L. J., & Cote, K. A. (2019). Changes in EEG multiscale entropy and power-law frequency scaling during the human sleep cycle. *Human Brain Mapping*, 40(2), 538–551. <https://doi.org/10.1002/hbm.24393>
- Nyberg, L., Lövdén, M., Riklund, K., Lindenberger, U., & Bäckman, L. (2012). Memory aging and brain maintenance. *Trends in Cognitive Sciences*, 16(5), 292–305. <https://doi.org/10.1016/j.tics.2012.04.005>
- Oostenveld, R., & Praamstra, P. (2001). The five percent electrode system for high-resolution EEG and ERP measurements. *Clinical Neurophysiology*, 112(4), 713–719.
- Ouyang, G., Hildebrandt, A., Schmitz, F., & Hermann (2020). Decomposing alpha and 1/f brain activities reveals their differential associations with cognitive processing speed. *NeuroImage*, 205, 116304.
- Pathania, A., Clark, M., Cowan, R., Euler, M., Duff, K., & Lohse, K. R. (2021). Relating resting EEG power spectra to age-related differences in cognitive performance: An observational pilot study. *MedRxiv*, 2021.02.12.21251655. <https://doi.org/10.1101/2021.02.12.21251655>
- Pathania, A., Schreiber, M., Miller, M. W., Euler, M. J., & Lohse, K. R. (2021). Exploring the reliability and sensitivity of the EEG power spectrum as a biomarker. *International Journal of Psychophysiology*, 160, 18–27. <https://doi.org/10.1016/j.ijpsycho.2020.12.002>
- Patton, D. E., Duff, K., Schoenberg, M. R., Mold, J., Scott, J. G., & Adams, R. L. (2003). Performance of Cognitively Normal African Americans on the RBANS in Community Dwelling Older Adults. *The Clinical Neuropsychologist*, 17(4), 515–530. <https://doi.org/10.1076/clin.17.4.515.27948>
- Poil, S.-S., De Haan, W., van der Flier, W. M., Mansvelde, H. D., Scheltens, P., & Linkenkaer-Hansen, K. (2013). Integrative EEG biomarkers predict progression to Alzheimer’s disease at the MCI stage. *Frontiers in Aging Neuroscience*, 5. <https://doi.org/10.3389/fnagi.2013.00058>
- Randolph, C., Tierney, M. C., Mohr, E., & Chase, T. N. (1998). The Repeatable Battery for the Assessment of Neuropsychological Status (RBANS): Preliminary Clinical Validity. *Journal of Clinical and Experimental Neuropsychology*, 20(3), 310–319. <https://doi.org/10.1076/jcen.20.3.310.823>
- R Core Team (2021). R: A language and environment for statistical computing. R Foundation for Statistical Computing, Vienna, Austria. URL <https://www.R-project.org/>.
- RStudio Team (2020). RStudio: Integrated Development for R. RStudio, PBC, Boston, MA URL <http://www.rstudio.com/>.
- Salthouse, T. A. (2000). Aging and measures of processing speed. *Biological Psychology*, 54(1), 35–54. [https://doi.org/10.1016/S0301-0511\(00\)00052-1](https://doi.org/10.1016/S0301-0511(00)00052-1)
- Salthouse, T. A., & Davis, H. P. (2006). Organization of cognitive abilities and neuropsychological variables across the lifespan. *Developmental Review*, 26(1), 31–54. <https://doi.org/10.1016/j.dr.2005.09.001>
- Schaefer, S. Y., Dibble, L. E., & Duff, K. (2015). Efficacy and Feasibility of Functional Upper Extremity Task-Specific Training for Older Adults With and Without Cognitive Impairment. *Neurorehabilitation and Neural Repair*, 29(7), 636–644. <https://doi.org/10.1177/1545968314558604>

- Schaefer, S. Y., & Hengge, C. R. (2016). Testing the concurrent validity of a naturalistic upper extremity reaching task. *Experimental Brain Research*, 234(1), 229–240. <https://doi.org/10.1007/s00221-015-4454-y>
- Schaworonkow, N., & Voytek, B. (2021). Longitudinal changes in aperiodic and periodic activity in electrophysiological recordings in the first seven months of life. *Developmental Cognitive Neuroscience*, 47, 100895.
- Thuwal, K., Banerjee, A., & Roy, D. (2021). Aperiodic and periodic components of ongoing oscillatory brain dynamics link distinct functional aspects of cognition across adult lifespan. *Eneuro*. <https://doi.org/10.1523/ENEURO.0224-21.2021>
- Tingley, D., Yamamoto, T., Hirose, K., Keele, L., & Imai, K. (2014). *Mediation: R package for causal mediation analysis*. <https://doi.org/10.18637/jss.v059.i05>
- Tran, T., Rolle, C., Gazzaley, A., & Voytek, B. (2020). Linked Sources of Neural Noise Contribute to Age-related Cognitive Decline. *Journal of Cognitive Neuroscience*, 32, 1–110. [https://doi.org/10.1162/jocn\\_a\\_01584](https://doi.org/10.1162/jocn_a_01584)
- Tucker-Drob, E. M. (2019). Cognitive Aging and Dementia: A Life-Span Perspective. *Annual Review of Developmental Psychology*, 1(1), 177–196. <https://doi.org/10.1146/annurev-devpsych-121318-085204>
- Voss, R. F., & Clarke, J. (1975). '1/f noise' in music and speech. *Nature*, 258, 317–318. <https://doi.org/10.1038/258317a0>
- Voytek, B., & Knight, R. T. (2015). Dynamic Network Communication as a Unifying Neural Basis for Cognition, Development, Aging, and Disease. *Biological Psychiatry*, 77(12), 1089–1097. <https://doi.org/10.1016/j.biopsych.2015.04.016>
- Voytek, B., Kramer, Mark. A., Case, J., Lepage, Kyle. Q., Tempesta, Zechari. R., Knight, Robert. T., & Gazzaley, A. (2015). Age-Related Changes in 1/f Neural Electrophysiological Noise. *Journal of Neuroscience*, 35(38), 13257–13265. <https://doi.org/10.1523/JNEUROSCI.2332-14.2015>
- Wagenmakers, E.-J., Farrell, S., & Ratcliff, R. (2004). Estimation and interpretation of 1/f $\alpha$  noise in human cognition. *Psychonomic Bulletin & Review*, 11(4), 579–615. <https://doi.org/10.3758/BF03196615>
- Ward, L. M., & Greenwood, P. E. (2007). 1/f noise. *Scholarpedia*, 2(12), 1537. <https://doi.org/10.4249/scholarpedia.1537>
- Waschke, L., Wöstmann, M., & Obleser, J. (2017). States and traits of neural irregularity in the age-varying human brain. *Scientific Reports*, 7(1), 17381. <https://doi.org/10.1038/s41598-017-17766-4>
- Wickham et al., (2019). Welcome to the tidyverse. *Journal of Open Source Software*, 4(43), 1686, <https://doi.org/10.21105/joss.01686>

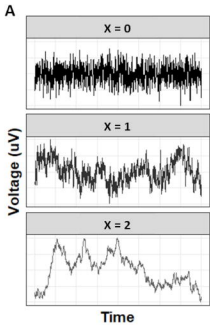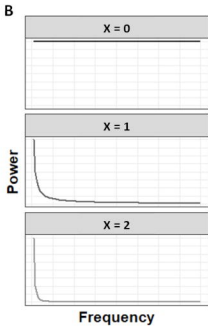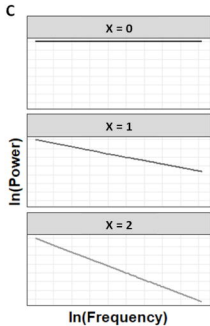

**A**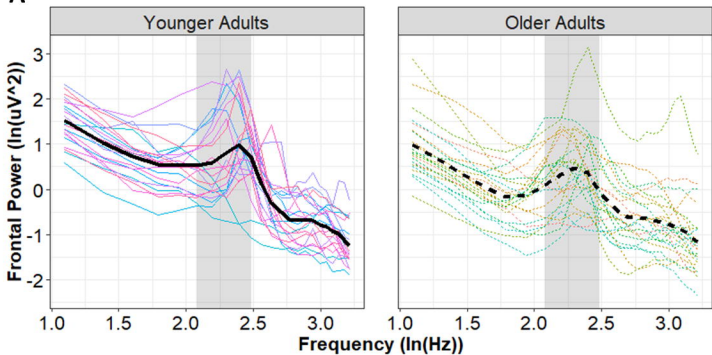**B**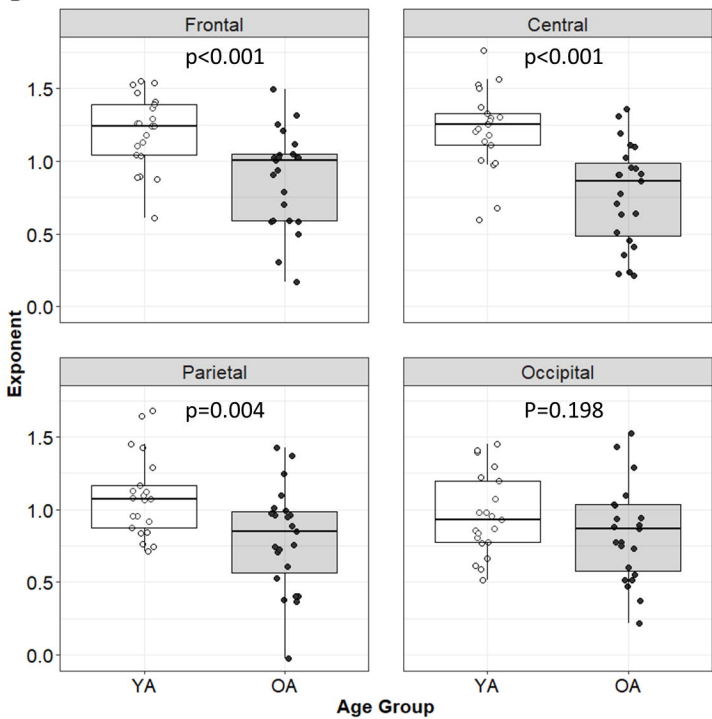



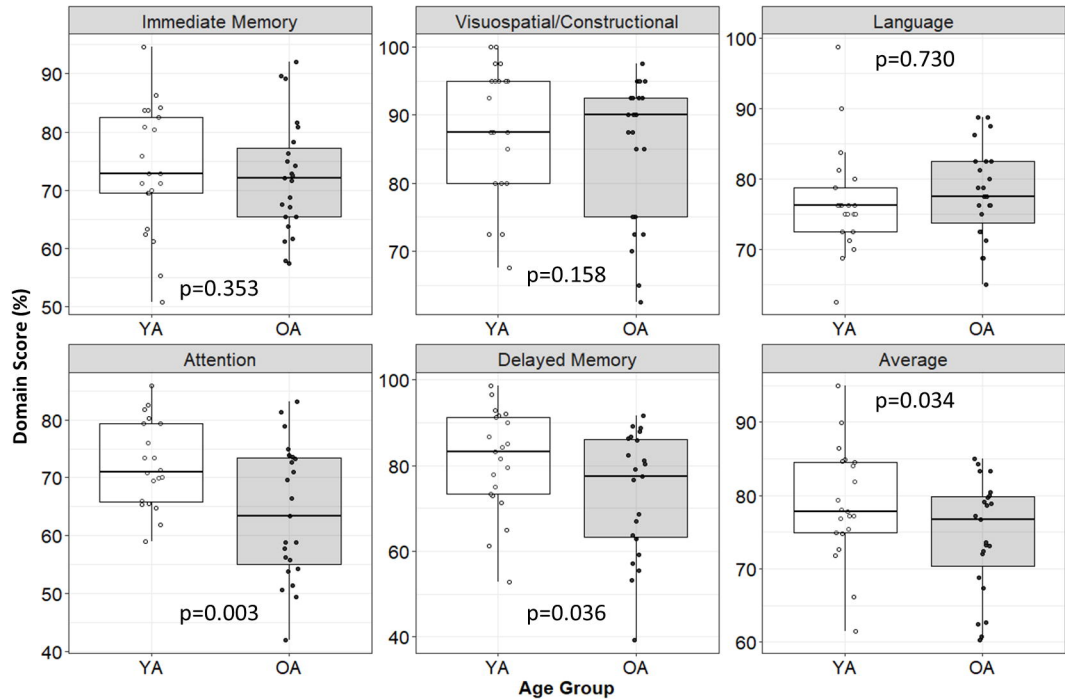

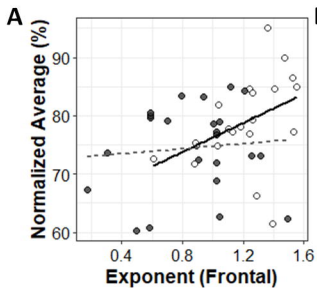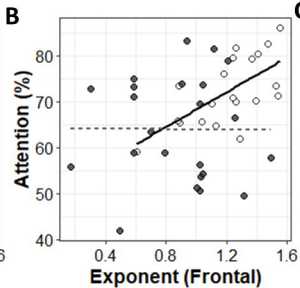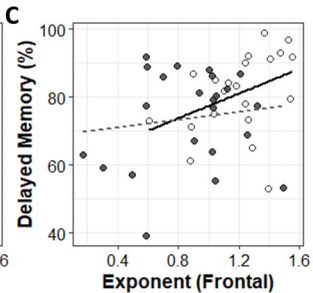

Labels ○ YA ● OA

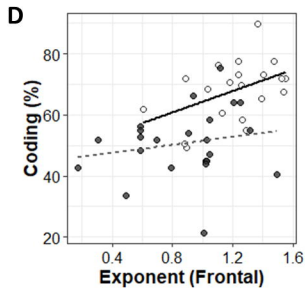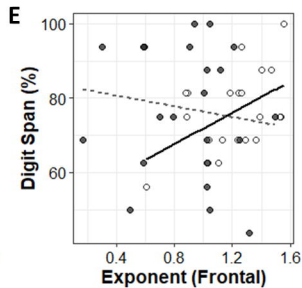

Source: https://medrxiv.org/content/10.1101/2021.02.12.21251655v3.full.pdf
